# Supplementary material for: Injury Related to Fall and Its Predictors among Medically Diagnosed Adults with Visual Impairment in Ethiopia: An Observational Cross-Sectional Study
Source: Adv Orthop. 2021 Feb 27;2021:6686068. doi: 10.1155/2021/6686068 (PMC7936889; doi:10.1155/2021/6686068)
Supplement: Supplementary Materials — Additional File 1: English version questionnaire. Additional File 2: STROBE statement checklist. [file 6686068.f1.zip]

Archive with 2 entries (2 files):
- 6686068.f1/Additional file 1.docx
- 6686068.f1/Additional file 2.docx
